# Supplementary material for: One step, In-situ phosphating construction of encapsulated Co2P and Co3(PO4)2 nanoparticles within 3D reticulated carbon for rechargeable Zn-Air batteries
Source: Research Square preprint supplement (doi:10.21203/rs.3.rs-7069913/v1), 2025-07-31
Supplement: Supplementary file 1 [file 0fa6d627d2682569d3bc1166.docx]

**Supplementary Information**

**One step, *In-situ* phosphating construction of encapsulated Co2P and Co3(PO4)2 nanoparticles within 3D reticulated carbon for rechargeable Zn-Air batteries**

Gang Chen a, Lina Zhou b, c*, Xin Xiong d, Xiaonan Xu b and Yingying Wang e*

*a Wuhan SolidLi New Energy Technology Co., Ltd, Wuhan, 430000, P. R. China*

*b Hubei Key Laboratory of Photoelectric Materials and Devices, College of Material Science and Engineering, Hubei Normal University, Huangshi, 435002, P. R. China*

*c* *National Laboratory of Solid State Microstructures, Nanjing University, Nanjing 210093, China*

*d College of Physics and Electronic Science, Hubei Normal University, Huangshi 435002, China*

*e School of Automation, Hubei University of Science and Technology, Xianning 437100, China*

*Corresponding authors.

E-mail address: zhlina@hbnu.edu.cn (Lina Zhou), wangyy@hbust.edu.cn (Yingying Wang)

**Experimental section:**

**1.1 Materials**

Aniline, HCl (37 wt.%), ammonium persulfate ((NH4)2S2O8, APS), phytic acid (70 wt.%), and cobalt nitrate hexahydrate (Co(NO3)2.6H2O) were purchased from Sigma-Aldrich. No further purification was required for any of the chemical reagents.

## 1.2 Synthesis of CoPO-Co2P@NPC electrocatalysts

The synthesis of polyaniline-phytic acid nanorods can be described as follows: Initial, 100 mL of deionized water, 4 mL of phytic acid, and 16 mL of concentrated HCl (37 wt.%) were mixed together with 1 g of aniline monomer. The mixture was stirred vigorously at 10°C for 5 mins. The polymerization reaction was initiated by dropwise adding of initiator solution (2.45 g of (NH4)2S2O8 dissolved in 50 mL of deionized water), the reaction was lasted for 6 h. In order to get the pANI-PA powder, the resultant dark green powder was filtered, washed with ethanol, and dried at 60°C overnight. For comparison, pure pANI was prepared without the use of phytic acid. As can be shown in Figure S1, the as-fabricated pANI-PA product exhibits a uniform nanorod-like shape throughout its whole surface.

A 20 mL ethanol solution was ultrasonically mixed with 0.2 g of as-prepared pANI-PA nanorods for 30 mins. Afterwards, 0.25 mmol of Co(NO3)2.6H2O was dissolved in the aforementioned solution to produce a uniform mixed phase. The mixture was then dried at 60°C for 12 hours. The obtained dark green powder was subjected to pre-annealing at a temperature of 400°C in N2 atmosphere for 2 h, with a heating rate of 2°C/min. The temperature was then raised to 900°C (at a rate of 5°C/min) and maintained for another 5 hours. The carbon composite derived from the pANI-PA was marked as CoPO-Co2P@NPC.

Without the use of Co(NO3)2**.**6H2O, NPC was synthesized using the same method.

- 1. **Material characterization**

The X-ray diffraction (XRD) analysis was performed utilizing Cu Ka radiation (k = 0.154178 nm) through a Hitachi SmartLab SE X-ray diffractometer. The catalyst morphologies were acquired by the use of scanning electron microscopy (SEM; Zeiss Gemini SEM300) and transmission electron microscopy (TEM; Thermo Fisher Talos F200S). HRTEM measurements were conducted using the Thermo Fisher Talos F200S instrument, accompanied by EDX analysis. The X-ray photoelectron spectra were acquired using the Thermo VG VG MultiLab 2000 instrument, while the differential scanning calorimetry (DSC) examination was conducted utilizing a TA/DSC analyzer (NETZSCH STA 449F5). The Fourier transform infrared (FT-IR) spectra were acquired using a Tensor 27 FT-IR spectrometer. The Raman spectrum was acquired via a HORIBA Evolution Raman Microscope spectrometer, employing an excitation wavelength of 532 nm.

- 1. **Electrochemical measurements**

The electrochemical analysis was carried out with the use of a Princeton electrochemical workstation and Pine Instruments Co. Ltd. The electrochemical measurements were performed using a three-electrode system in a 0.1 M potassium hydroxide (KOH) solution. A carbon rod served as the counter electrode, with silver/silver chloride (3 M KCl) serving as the reference. The working electrode was a rotating disc electrode (RDE).

The electrocatalyst ink was made using the following procedure: 4 mg of the as-fabricated catalyst was dispersed in a 15 μL Nafion (5 wt.%) and 300 μL isopropanol solution. The mixture was then ultrasonically mixed for at least an hour to generate a well-dispersed suspension. A small amount (10 μL) of catalyst ink was carefully dropped onto the 5 mm diameter working electrode, with an approximate loading of 0.45 mg cm-2. Cyclic voltammograms (CVs) and linear sweep voltammograms (LSVs) were conducted in the potential range of -1.2 to 0.2 V (against Ag/AgCl) and 0.2 to -1.0 V (versus Ag/AgCl) for the oxygen reduction reaction (ORR). The LSV curves were obtained at different rotational speeds (400, 625, 900, 1225, and 1600 rpm) using a scan rate of 5 mV/s. The measured potential was converted to the reversible hydrogen electrode (RHE) using the Nernst equation: *E*RHE = *E*Ag/AgCl + 0.197 + 0.059pH. LSV profiles were obtained for the OER reaction with a scan rate of 5 mV/s from 1.2 to 1.8 V versus RHE. The K-L equation (Eqs. 1-2) was employed to calculate the electron transfer number (n) from the RDE measurements:

(1)

(2)

*J*: the measured current density; *Jk*: kinetic current density; *JL*: diffusion-limiting current density; *ω*: angular velocity (rpm); *F*: Faraday constant (96500 C mol-1); *n*: electron transfer number; ν: viscosity of the electrolyte (1.0×10-2 cm2 s-1); *Do*: diffusion coefficient of O2 in 0.1 M KOH (1.9×10-5 cm2 s-1); *Co*: bulk concentration of O2 (1.2×10-6mol cm-3).

**1.6 Assembly of rechargeable Zn-air batteries (ZABs):**

A polished zinc plate (with a purity surpassing 99.99%) is used as the anode in both the liquid Zn-air and the flexible Zn-air batteries. The cathode was a carbon cloth that has been thoughtfully loaded with an electrocatalyst, with a mass loading of 1 mg cm−2. The electrolyte was a solution of 6 M potassium hydroxide (KOH). In addition, the air electrode was constructed by mixing 50 wt.% of Pt/C and 50 wt.% of RuO2 as reference. A metal-air battery has been constructed and its galvano-static discharge and polarization curves were examined at a current density of 5 5 mA cm−2,throughout the voltage range of 1.6 to 0 V.


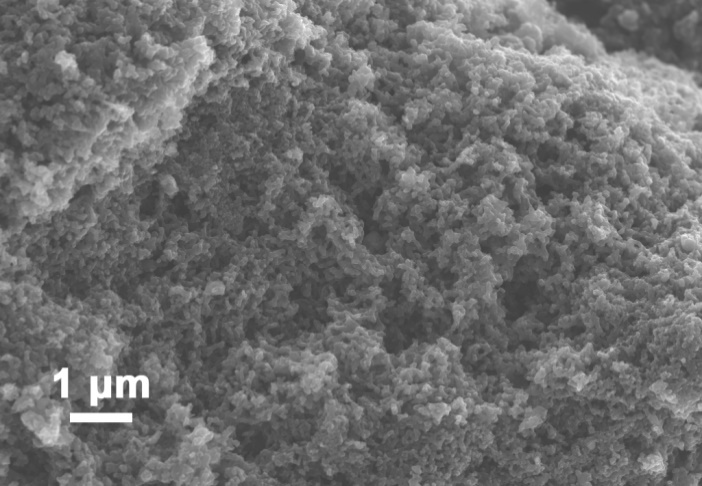


Figure S1 The SEM images of NPC

**Table S1** **The structure parameters of catalysts**

| Electrocatalyst | SBET *a* (m2/g) | Vt *b* (cc/g) |
| --- | --- | --- |
| NPC | 654.7 | 0.69 |
| CoPO-Co2P@NPC | 260.3 | 0.25 |

*a* SBET: BET specific surface area; *b* Vt: pore volume at *P*/*Po* = 0.995.





Figure S2 The BJH pore size distribution plots of NPC and CoPO-Co2P@NPC.

**Table S2** Comparison of ORR catalytic activity of the catalysts in this work with the recently reported catalysts in alkaline solution*a.*

| **Electrocatalysts** | ***E1/2* (*vs*. RHE)** | ***Eonset*(*vs*. RHE)** | **Tafel slope (mV dec-1)** | **Ref** |
| --- | --- | --- | --- | --- |
| CoPO-Co2P@NPC | 0.80 | 0.99 | 81.65 | This work |
| 20% Pt/C | 0.78 | 1.15 | 109.27 | This work |
| Co2P@NCNTs-15 | 0.82 | 0.90 | undefined | 1 |
| Co-NCNTs//CCM | 0.79 | 0.86 | 80 | 2 |
| Co2P/CoP@NPC | 0.77 | undefined | undefined | 3 |
| CoNi-SAs/NC | 0.76 | 0.88 | undefined | 4 |
| Co2P@CNF | 0.803 | 0.91 | 77.1 | 5 |

*a* All the potentials values above are converted to *vs*. RHE for comparison. In 0.1 M KOH electrolyte (pH=13), *E*(*vs*. RHE) = *E*(*vs*. Ag/AgCl) + 0.197 V + 0.0591pH.

**Table S3** Comparison of OER catalytic activity of the catalysts in this work with the recently reported catalysts in alkaline solution.

| **Electrocatalysts** | ***E*OERat 10 mA cm-2 (*vs*. RHE)** | **Tafel slope (mV dec-1)** | **Ref** |
| --- | --- | --- | --- |
| CoPO-Co2P@NPC | 1.73 | 145.13 | This work |
| RuO2 | 1.56 | 127.70 | This work |
| Co-NCNTs//CCM | 1.64 | 131 | 2 |
| Co2P@NPC | 1.61 | 87 | 3 |
| C-Co2P | 1.64 | 86.8 | 6 |
| Co2P | 1.58 | 61.9 | 7 |
| Co2P@Co3O4 | 1.57 | 60 | 8 |

**Table S4** Performances of recently reported Zn-air batteries based on bi-functional catalysts.

| **Electrocatalysts** | **Open-circuit voltage (V)** | **Peak power density (mW cm-2)** | **Durability** | **Ref** |
| --- | --- | --- | --- | --- |
| CoPO-Co2P@NPC | 1.43 | 265 | Over 450 hours@5 mA/cm2 | This work |
| Pt/C||RuO2 | 1.42 | 211 | 270 hours@5 mA/cm2 | This work |
| Co2P@NCNTs-15 | 1.30 | 159.7 | 100 hours@10 mA/cm2 | 1 |
| Co2P@NPC | 1.43 | 157 | 140 hours@10 mA/cm2 | 3 |
| Co2P-PCA-800 | 1.44 | 58 | 32 hours@10 mA cm-2 | 9 |
| 7% Cu-Co2P/CNFs | 1.36 | 230 | 80 hours@5 mA cm-2 | 10 |
| CoO/CoxP | 1.40 | 122.73 | 200 hours@5 mA cm-2 | 11 |
| 7.1%Cu-Co2P@2D-NPC | 1.40 | 236.1 | 160 hours@10 mA cm-2 | 12 |

**References:**

1. Peng, X.; Liu, Y.; Hu, S.; Zheng, P.; Fu, Y.; Dong, P.; Xiao, J.; Han, L.; Zhang, Y., Synthesis of a highly efficient bifunctional Co2P@N-doped carbon nanotubes electrocatalyst by GO-Induced assembly strategy for rechargeable Zn-air batteries. *Journal of Alloys and Compounds* **2021,** *889*.

2. Zhou, G.; Liu, G.; Liu, X.; Yu, Q.; Mao, H.; Xiao, Z.; Wang, L., 1D/3D Heterogeneous Assembling Body as Trifunctional Electrocatalysts Enabling Zinc-Air Battery and Self-Powered Overall Water Splitting. *Adv Mater* **2021,** *32* (4), e2107608.

3. Shi, Q.; Liu, Q.; Zheng, Y.; Dong, Y.; Wang, L.; Liu, H.; Yang, W., Controllable Construction of Bifunctional CoxP@N,P-doped Carbon Electrocatalysts for Rechargeable Zinc–Air Batteries. *Energy & Environmental Materials* **2021,** *11* (2), 515-523.

4. Han, X.; Ling, X.; Yu, D.; Xie, D.; Li, L.; Peng, S.; Zhong, C.; Zhao, N.; Deng, Y.; Hu, W., Atomically Dispersed Binary Co-Ni Sites in Nitrogen-Doped Hollow Carbon Nanocubes for Reversible Oxygen Reduction and Evolution. *Adv Mater* **2019,** *31* (49), e1905622.

5. Gao, J.; Wang, J.; Zhou, L.; Cai, X.; Zhan, D.; Hou, M.; Lai, L., Co2P@N,P-codoped Carbon Nanofiber as Free-standing Air-electrode for Zn-air Batteries: Synergy Effects of CoNx Satellites shells. *ACS Appl Mater Interfaces* **2019,** *12* (10), 10364-10372.

6. Song, M.; He, Y.; Zhang, M.; Zheng, X.; Wang, Y.; Zhang, J.; Han, X.; Zhong, C.; Hu, W.; Deng, Y., Controllable synthesis of Co2P nanorods as high-efficiency bifunctional electrocatalyst for overall water splitting. *Journal of Power Sources* **2018,** *402*, 345-352.

7. Hua, Y.; Xu, Q.; Hu, Y.; Jiang, H.; Li, C., Interface-strengthened CoP nanosheet array with Co2P nanoparticles as efficient electrocatalysts for overall water splitting. *Journal of Energy Chemistry* **2019,** *37*, 1-6.

8. Yao, L.; Zhang, N.; Wang, Y.; Ni, Y.; Yan, D.; Hu, C., Facile formation of 2D Co2P@Co3O4 microsheets through in-situ toptactic conversion and surface corrosion: Bifunctional electrocatalysts towards overall water splitting. *Journal of Power Sources* **2018,** *374*, 142-148.

9. Xiao, Y.; Pei, Y.; Hu, Y.; Ma, R.; Wang, D.; Wang, J., Co2P@P-Doped 3D Porous Carbon for Bifunctional Oxygen Electrocatalysis. *Acta Phys. -Chim. Sin.* **2021,** *37* (7), 2009051.

10. Sun, X.; Liang, H.; Yu, H.; Bai, J.; Li, C., Embedding Co2P nanoparticles in Cu doping carbon fibers for Zn-air batteries and supercapacitors. *Nanotechnology* **2022,** *33*, 135202.

11. Niu, Y.; Xiao, M.; Zhu, J.; Zeng, T.; Li, J.; Zhang, W.; Su, D.; Yu, A.; Chen, Z., Trimurti Heterostructured Hybrid with Intimate CoO/CoxP Interface as Robust Bifunctional Air Electrode for Rechargeable Zn-air Batteries. *Journal of Materials Chemistry A* **2020,** *8* (18), 9177-9184.

12. Diao, L.; Yang, T.; Chen, B.; Zhang, B.; Zhao, N.; Shi, C.; Liu, E.; Ma, L.; He, C., Electronic reconfiguration of Co2P induced by Cu doping enhancing oxygen reduction reaction activity in zinc-air batteries. *Journal of Materials Chemistry A* **2019,** *7* (37), 21232-21243.
