# Supplementary material for: One step, In-situ phosphating construction of encapsulated Co2P and Co3(PO4)2 nanoparticles within 3D reticulated carbon for rechargeable Zn-Air batteries
Source: Research Square preprint supplement (doi:10.21203/rs.3.rs-7069913/v1), 2025-07-31
Supplement: Supplementary file 2 [file 8d200521ef5578469cc37a01.docx]

**Highlights**

- An in-situ phosphating approach has been investigated to fabricate Co2P and Co3(PO4)2 nanoparticles implanted N, P-doped porous carbon composite;
- The organic polymer derived Co2P and Co3(PO4)2 nanoparticles implanted N, P-doped porous carbon composite demonstrates impressive performances in both ORR and OER.
