# Supplementary figures and images for: One step, In-situ phosphating construction of encapsulated Co2P and Co3(PO4)2 nanoparticles within 3D reticulated carbon for rechargeable Zn-Air batteries
Source: Research Square preprint supplement (doi:10.21203/rs.3.rs-7069913/v1), 2025-07-31

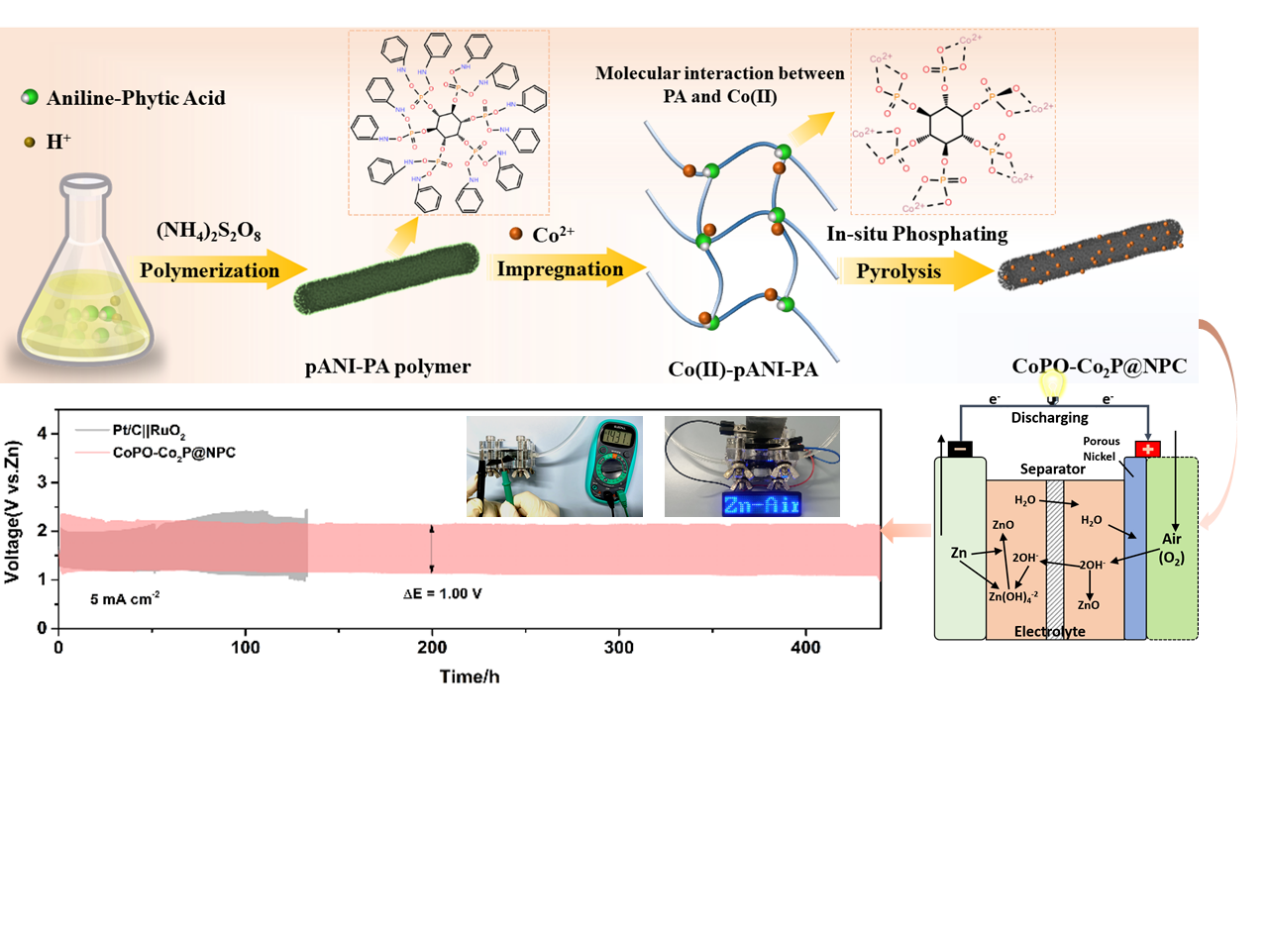

Supplement: Supplementary file 3 [file aa677c26fd77c792c6adce2c.docx]
